# Supplementary material for: Solvothermal syntheses and characterizations of lanthanide(iii)/SbS43− complexes associated by a dien ligand: A detailed study based on the lanthanide contraction effect
Source: Royal Society of Chemistry journal article supplement (doi:10.1039/c2ce25135c), 2012-01-01
Supplement: c2ce25135c.pdf [file c2ce25135c.pdf]

## Electronic Supplementary Information for

Solvothermal syntheses and characterizations of lanthanide(III)/SbS<sub>4</sub><sup>3-</sup> complexes associated by dien ligand: A detailed study based on the lanthanide contraction effect

Weiwei Tang, Ruihong Chen, Jing Zhao, Wenqing Jiang, Yong Zhang and Dingxian Jia \*

*College of Chemistry, Chemical Engineering and Materials Science, Soochow University, Suzhou 215123, People's Republic of China.*

**Table S1.** Selected bond lengths (Å) and angles (°) for **1a**

|                                                                                           |            |                   |            |
|-------------------------------------------------------------------------------------------|------------|-------------------|------------|
| Sb(1)–S(1)                                                                                | 2.325(3)   | Sb(1)–S(2)        | 2.334(3)   |
| Sb(1)–S(3)                                                                                | 2.320(3)   | Sb(1)–S(4)        | 2.317(3)   |
| Pr(1)–S(1)                                                                                | 3.064(3)   | Pr(1)–S(2)        | 3.066(3)   |
| Pr(1)–S(3)#1                                                                              | 3.202(3)   |                   |            |
| Pr(1)–N(1)                                                                                | 2.704(8)   | Pr(1)–N(2)        | 2.717(9)   |
| Pr(1)–N(3)                                                                                | 2.704(8)   | Pr(1)–N(4)        | 2.656(8)   |
| Pr(1)–N(5)                                                                                | 2.682(9)   | Pr(1)–N(6)        | 2.718(8)   |
|                                                                                           |            |                   |            |
| S(1)–Sb(1)–S(2)                                                                           | 101.72(9)  | S(1)–Sb(1)–S(3)   | 113.60(10) |
| S(1)–Sb(1)–S(4)                                                                           | 109.82(10) | S(2)–Sb(1)–S(3)   | 109.67(9)  |
| S(2)–Sb(1)–S(4)                                                                           | 111.47(10) | S(3)–Sb(1)–S(4)   | 110.32(9)  |
| Sb(1)–S(1)–Pr(1)                                                                          | 90.77(8)   | Sb(1)–S(2)–Pr(1)  | 90.55(8)   |
| Sb(1)–S(3)–Pr(1)#2                                                                        | 118.81(9)  |                   |            |
| S(1)–Pr(1)–S(2)                                                                           | 72.24(7)   | S(1)–Pr(1)–S(3)#1 | 137.57(7)  |
| S(2)–Pr(1)–S(3)#1                                                                         | 131.32(7)  | S(1)–Pr(1)–N(1)   | 75.5(2)    |
| S(1)–Pr(1)–N(2)                                                                           | 138.5(2)   | S(1)–Pr(1)–N(3)   | 133.7(2)   |
| S(1)–Pr(1)–N(4)                                                                           | 78.1(2)    | S(1)–Pr(1)–N(5)   | 70.0(2)    |
| S(1)–Pr(1)–N(6)                                                                           | 91.78(19)  | S(2)–Pr(1)–N(1)   | 76.44(19)  |
| S(2)–Pr(1)–N(2)                                                                           | 91.00(19)  | S(2)–Pr(1)–N(3)   | 67.8(2)    |
| S(2)–Pr(1)–N(4)                                                                           | 79.0(2)    | S(2)–Pr(1)–N(5)   | 131.1(2)   |
| S(2)–Pr(1)–N(6)                                                                           | 146.97(18) | S(3)#1–Pr(1)–N(1) | 137.3(2)   |
| S(3)#1–Pr(1)–N(2)                                                                         | 81.9(2)    | S(3)#1–Pr(1)–N(3) | 65.6(2)    |
| S(3)#1–Pr(1)–N(4)                                                                         | 74.5(2)    | S(3)#1–Pr(1)–N(5) | 69.0(2)    |
| S(3)#1–Pr(1)–N(6)                                                                         | 79.83(18)  | N(1)–Pr(1)–N(2)   | 63.6(3)    |
| N(1)–Pr(1)–N(3)                                                                           | 115.4(3)   | N(1)–Pr(1)–N(4)   | 148.2(3)   |
| N(1)–Pr(1)–N(5)                                                                           | 121.1(3)   | N(1)–Pr(1)–N(6)   | 71.5(3)    |
| N(2)–Pr(1)–N(3)                                                                           | 65.1(3)    | N(2)–Pr(1)–N(4)   | 136.9(3)   |
| N(2)–Pr(1)–N(5)                                                                           | 137.8(3)   | N(2)–Pr(1)–N(6)   | 82.1(3)    |
| N(3)–Pr(1)–N(4)                                                                           | 72.3(3)    | N(3)–Pr(1)–N(5)   | 123.1(3)   |
| N(3)–Pr(1)–N(6)                                                                           | 134.5(3)   | N(4)–Pr(1)–N(5)   | 63.9(3)    |
| N(4)–Pr(1)–N(6)                                                                           | 126.9(3)   | N(5)–Pr(1)–N(6)   | 63.7(2)    |
| Symmetry transformations used to generate equivalent atoms: #1) x+1, y, z; #2) x–1, y, z. |            |                   |            |

**Table S2.** Selected bond lengths (Å) and angles (°) for **1b**

|                                                                                           |            |                   |            |
|-------------------------------------------------------------------------------------------|------------|-------------------|------------|
| Sb(1)–S(1)                                                                                | 2.324(2)   | Sb(1)–S(2)        | 2.334(2)   |
| Sb(1)–S(3)                                                                                | 2.320(2)   | Sb(1)–S(4)        | 2.317(2)   |
| Nd(1)–S(1)                                                                                | 3.017(2)   | Nd(1)–S(2)        | 3.025(2)   |
| Nd(1)–S(3)#1                                                                              | 3.203(2)   |                   |            |
| Nd(1)–N(1)                                                                                | 2.633(7)   | Nd(1)–N(2)        | 2.662(7)   |
| Nd(1)–N(3)                                                                                | 2.641(7)   | Nd(1)–N(4)        | 2.653(7)   |
| Nd(1)–N(5)                                                                                | 2.625(7)   | Nd(1)–N(6)        | 2.601(7)   |
|                                                                                           |            |                   |            |
| S(1)–Sb(1)–S(2)                                                                           | 100.80(8)  | S(1)–Sb(1)–S(3)   | 114.13(8)  |
| S(1)–Sb(1)–S(4)                                                                           | 109.94(8)  | S(2)–Sb(1)–S(3)   | 110.01(8)  |
| S(2)–Sb(1)–S(4)                                                                           | 111.58(8)  | S(3)–Sb(1)–S(4)   | 110.10(8)  |
| Sb(1)–S(1)–Nd(1)                                                                          | 91.06(7)   | Sb(1)–S(2)–Nd(1)  | 90.68(7)   |
| Sb(1)–S(3)–Nd(1)#2                                                                        | 119.59(8)  |                   |            |
| S(1)–Nd(1)–S(2)                                                                           | 72.87(6)   | S(1)–Nd(1)–S(3)#1 | 137.42(6)  |
| S(2)–Nd(1)–S(3)#1                                                                         | 131.87(6)  | S(1)–Nd(1)–N(1)   | 134.02(17) |
| S(1)–Nd(1)–N(2)                                                                           | 139.43(19) | S(1)–Nd(1)–N(3)   | 75.15(18)  |
| S(1)–Nd(1)–N(4)                                                                           | 92.42(17)  | S(1)–Nd(1)–N(5)   | 70.39(18)  |
| S(1)–Nd(1)–N(6)                                                                           | 77.46(19)  | S(2)–Nd(1)–N(1)   | 68.35(17)  |
| S(2)–Nd(1)–N(2)                                                                           | 91.68(17)  | S(2)–Nd(1)–N(3)   | 76.35(16)  |
| S(2)–Nd(1)–N(4)                                                                           | 147.01(16) | S(2)–Nd(1)–N(5)   | 131.91(17) |
| S(2)–Nd(1)–N(6)                                                                           | 78.18(18)  | S(3)#1–Nd(1)–N(1) | 65.10(17)  |
| S(3)#1–Nd(1)–N(2)                                                                         | 80.59(18)  | S(3)#1–Nd(1)–N(3) | 136.88(17) |
| S(3)#1–Nd(1)–N(4)                                                                         | 78.71(16)  | S(3)#1–Nd(1)–N(5) | 68.25(18)  |
| S(3)#1–Nd(1)–N(6)                                                                         | 76.18(19)  | N(1)–Nd(1)–N(2)   | 66.1(3)    |
| N(1)–Nd(1)–N(3)                                                                           | 117.0(2)   | N(1)–Nd(1)–N(4)   | 133.5(2)   |
| N(1)–Nd(1)–N(5)                                                                           | 121.3(2)   | N(1)–Nd(1)–N(6)   | 71.3(2)    |
| N(2)–Nd(1)–N(3)                                                                           | 64.7(3)    | N(2)–Nd(1)–N(4)   | 80.5(2)    |
| N(2)–Nd(1)–N(5)                                                                           | 136.3(2)   | N(2)–Nd(1)–N(6)   | 137.0(3)   |
| N(3)–Nd(1)–N(4)                                                                           | 71.3(2)    | N(3)–Nd(1)–N(5)   | 121.2(2)   |
| N(3)–Nd(1)–N(6)                                                                           | 146.9(3)   | N(4)–Nd(1)–N(5)   | 64.4(2)    |
| N(4)–Nd(1)–N(6)                                                                           | 128.3(2)   | N(5)–Nd(1)–N(6)   | 64.5(2)    |
| Symmetry transformations used to generate equivalent atoms: #1) x+1, y, z; #2) x–1, y, z. |            |                   |            |

**Table S3.** Selected bond lengths (Å) and angles (°) for **1c**

|                                                                                           |            |                   |            |
|-------------------------------------------------------------------------------------------|------------|-------------------|------------|
| Sb(1)–S(1)                                                                                | 2.334(2)   | Sb(1)–S(2)        | 2.320(2)   |
| Sb(1)–S(3)                                                                                | 2.321(2)   | Sb(1)–S(4)        | 2.319(2)   |
| Sm(1)–S(1)                                                                                | 3.006(2)   | Sm(1)–S(2)        | 2.995(2)   |
| Sm(1)–S(3)#1                                                                              | 3.248(2)   |                   |            |
| Sm(1)–N(1)                                                                                | 2.609(8)   | Sm(1)–N(2)        | 2.630(7)   |
| Sm(1)–N(3)                                                                                | 2.616(7)   | Sm(1)–N(4)        | 2.585(7)   |
| Sm(1)–N(5)                                                                                | 2.598(7)   | Sm(1)–N(6)        | 2.623(7)   |
|                                                                                           |            |                   |            |
| S(1)–Sb(1)–S(2)                                                                           | 100.70(8)  | S(1)–Sb(1)–S(3)   | 110.29(8)  |
| S(1)–Sb(1)–S(4)                                                                           | 111.50(8)  | S(2)–Sb(1)–S(3)   | 114.32(9)  |
| S(2)–Sb(1)–S(4)                                                                           | 109.75(9)  | S(3)–Sb(1)–S(4)   | 110.00(8)  |
| Sb(1)–S(1)–Sm(1)                                                                          | 90.59(7)   | Sb(1)–S(2)–Sm(1)  | 91.11(7)   |
| Sb(1)–S(3)–Sm(1)#2                                                                        | 119.40(9)  |                   |            |
| S(1)–Sm(1)–S(2)                                                                           | 73.33(6)   | S(1)–Sm(1)–S(3)#1 | 131.94(6)  |
| S(2)–Sm(1)–S(3)#1                                                                         | 137.22(6)  | S(1)–Sm(1)–N(1)   | 68.5(2)    |
| S(1)–Sm(1)–N(2)                                                                           | 91.98(17)  | S(1)–Sm(1)–N(3)   | 76.34(17)  |
| S(1)–Sm(1)–N(4)                                                                           | 77.60(17)  | S(1)–Sm(1)–N(5)   | 132.66(17) |
| S(1)–Sm(1)–N(6)                                                                           | 147.01(16) | S(2)–Sm(1)–N(1)   | 134.1(2)   |
| S(2)–Sm(1)–N(2)                                                                           | 139.77(19) | S(2)–Sm(1)–N(3)   | 74.97(18)  |
| S(2)–Sm(1)–N(4)                                                                           | 77.43(19)  | S(2)–Sm(1)–N(5)   | 71.19(18)  |
| S(2)–Sm(1)–N(6)                                                                           | 92.67(17)  | S(3)#1–Sm(1)–N(1) | 64.8(2)    |
| S(3)#1–Sm(1)–N(2)                                                                         | 80.17(18)  | S(3)#1–Sm(1)–N(3) | 136.88(17) |
| S(3)#1–Sm(1)–N(4)                                                                         | 76.75(19)  | S(3)#1–Sm(1)–N(5) | 67.13(18)  |
| S(3)#1–Sm(1)–N(6)                                                                         | 78.35(16)  | N(1)–Sm(1)–N(2)   | 66.8(3)    |
| N(1)–Sm(1)–N(3)                                                                           | 117.9(3)   | N(1)–Sm(1)–N(4)   | 70.4(3)    |
| N(1)–Sm(1)–N(5)                                                                           | 119.7(3)   | N(1)–Sm(1)–N(6)   | 133.1(3)   |
| N(2)–Sm(1)–N(3)                                                                           | 65.1(3)    | N(2)–Sm(1)–N(4)   | 136.8(3)   |
| N(2)–Sm(1)–N(5)                                                                           | 135.2(2)   | N(2)–Sm(1)–N(6)   | 79.6(2)    |
| N(3)–Sm(1)–N(4)                                                                           | 146.4(2)   | N(3)–Sm(1)–N(5)   | 121.8(2)   |
| N(3)–Sm(1)–N(6)                                                                           | 71.1(2)    | N(4)–Sm(1)–N(5)   | 64.9(2)    |
| N(4)–Sm(1)–N(6)                                                                           | 129.3(2)   | N(5)–Sm(1)–N(6)   | 64.8(2)    |
| Symmetry transformations used to generate equivalent atoms: #1) x–1, y, z; #2) x+1, y, z. |            |                   |            |

**Table S4.** Selected bond lengths (Å) and angles (°) for **2a**

|                                                                                        |            |                   |            |
|----------------------------------------------------------------------------------------|------------|-------------------|------------|
| Sb(1)–S(1)                                                                             | 2.3503(18) | Sb(1)–S(2)        | 2.3098(18) |
| Eu(1)–S(1)                                                                             | 2.8415(18) | Eu(1)–N(1)        | 2.570(5)   |
| Eu(1)–N(2)                                                                             | 2.581(6)   | Eu(1)–N(3)        | 2.605(5)   |
|                                                                                        |            |                   |            |
| S(2)–Sb(1)–S(1)                                                                        | 107.69(7)  | S(1)–Sb(1)–S(1)#1 | 104.17(9)  |
| S(2)#1–Sb(1)–S(1)                                                                      | 110.78(7)  | S(2)#1–Sb(1)–S(2) | 115.19(10) |
| Sb(1)–S(1)–Eu(1)                                                                       | 87.18(6)   | S(1)#1–Eu(1)–S(1) | 81.47(7)   |
| N(1)–Eu(1)–S(1)#1                                                                      | 152.95(13) | N(2)–Eu(1)–S(1)#1 | 138.95(13) |
| N(1)–Eu(1)–S(1)                                                                        | 90.83(14)  | N(2)–Eu(1)–S(1)   | 83.90(14)  |
| N(3)–Eu(1)–S(1)                                                                        | 80.46(14)  | N(3)–Eu(1)–S(1)#1 | 73.87(13)  |
| N(1)–Eu(1)–N(1)#1                                                                      | 106.7(3)   | N(2)–Eu(1)–N(2)#1 | 129.4(3)   |
| N(1)–Eu(1)–N(2)                                                                        | 64.76(17)  | N(2)–Eu(1)–N(3)#1 | 131.11(19) |
| N(1)–Eu(1)–N(2)#1                                                                      | 85.17(19)  | N(2)–Eu(1)–N(3)   | 65.96(17)  |
| N(1)–Eu(1)–N(3)#1                                                                      | 72.49(18)  | N(1)–Eu(1)–N(3)   | 130.58(17) |
| N(3)#1–Eu(1)–N(3)                                                                      | 146.0(3)   |                   |            |
| Symmetry transformations used to generate equivalent atoms: #1)<br>$-x+1, y, -z+1/2$ . |            |                   |            |

**Table S5.** Selected bond lengths (Å) and angles (°) for **2b**

|                                                                                        |            |                   |            |
|----------------------------------------------------------------------------------------|------------|-------------------|------------|
| Sb(1)–S(1)                                                                             | 2.3489(11) | Sb(1)–S(2)        | 2.3112(12) |
| Dy(1)–S(1)                                                                             | 2.8132(12) | Dy(1)–N(1)        | 2.581(3)   |
| Dy(1)–N(2)                                                                             | 2.537(4)   | Dy(1)–N(3)        | 2.533(4)   |
|                                                                                        |            |                   |            |
| S(2)#1–Sb(1)–S(2)                                                                      | 114.89(7)  | S(1)–Sb(1)–S(1)#1 | 103.63(6)  |
| S(2)#1–Sb(1)–S(1)                                                                      | 111.01(4)  | S(2)–Sb(1)–S(1)   | 107.87(4)  |
| Sb(1)–S(1)–Dy(1)                                                                       | 87.17(4)   | S(1)#1–Dy(1)–S(1) | 82.03(5)   |
| N(1)–Dy(1)–S(1)#1                                                                      | 73.80(9)   | N(2)–Dy(1)–S(1)#1 | 139.61(9)  |
| N(1)–Dy(1)–S(1)                                                                        | 79.80(9)   | N(2)–Dy(1)–S(1)   | 84.71(10)  |
| N(3)–Dy(1)–S(1)                                                                        | 91.67(10)  | N(3)–Dy(1)–S(1)#1 | 152.48(9)  |
| N(1)–Dy(1)–N(1)#1                                                                      | 144.82(18) | N(3)–Dy(1)–N(3)#1 | 105.26(19) |
| N(2)–Dy(1)–N(2)#1                                                                      | 127.3(2)   | N(3)–Dy(1)–N(2)   | 65.45(12)  |
| N(2)–Dy(1)–N(1)                                                                        | 66.35(12)  | N(3)#1–Dy(1)–N(2) | 82.94(13)  |
| N(2)#1–Dy(1)–N(1)                                                                      | 132.01(12) | N(3)–Dy(1)–N(1)   | 131.59(12) |
| N(3)#1–Dy(1)–N(1)                                                                      | 72.72(12)  |                   |            |
| Symmetry transformations used to generate equivalent atoms: #1)<br>$-x+1, y, -z+3/2$ . |            |                   |            |

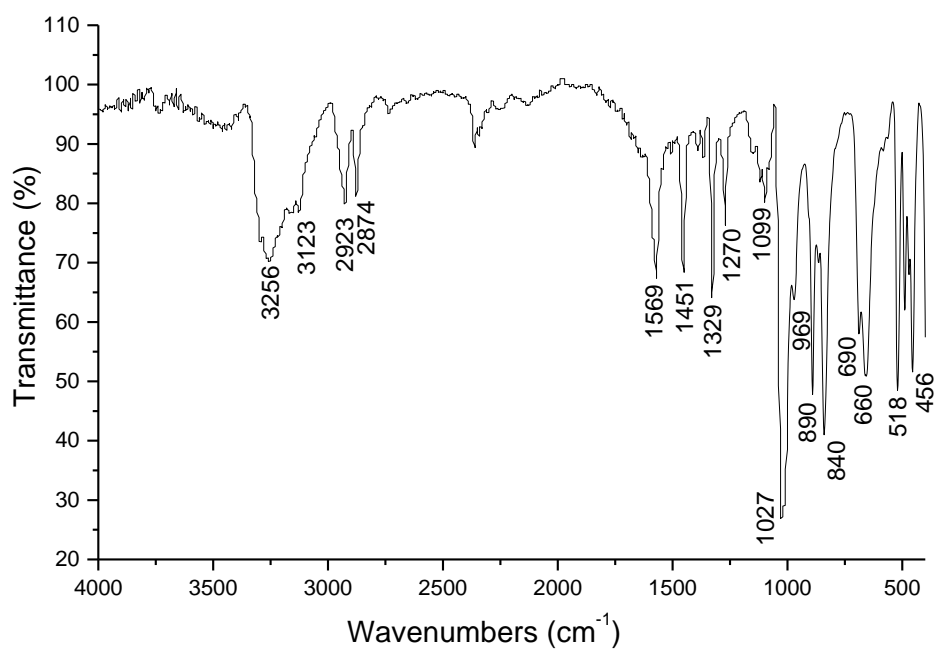

**Fig. S1** IR spectra of complex **1a**.

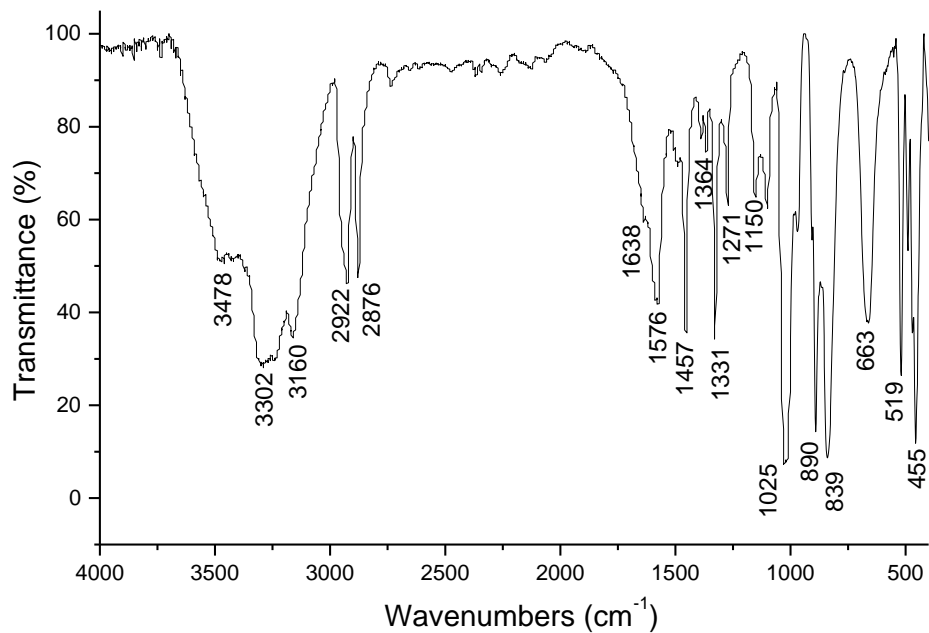

**Fig. S2** IR spectra of complex **2a**.

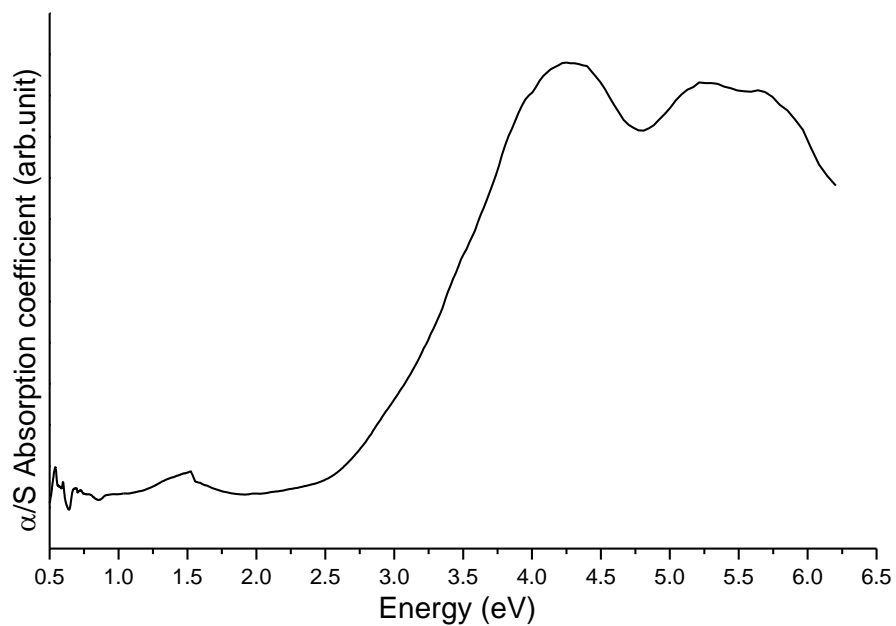

**Fig. S3** Optical absorption spectra of **1b**.

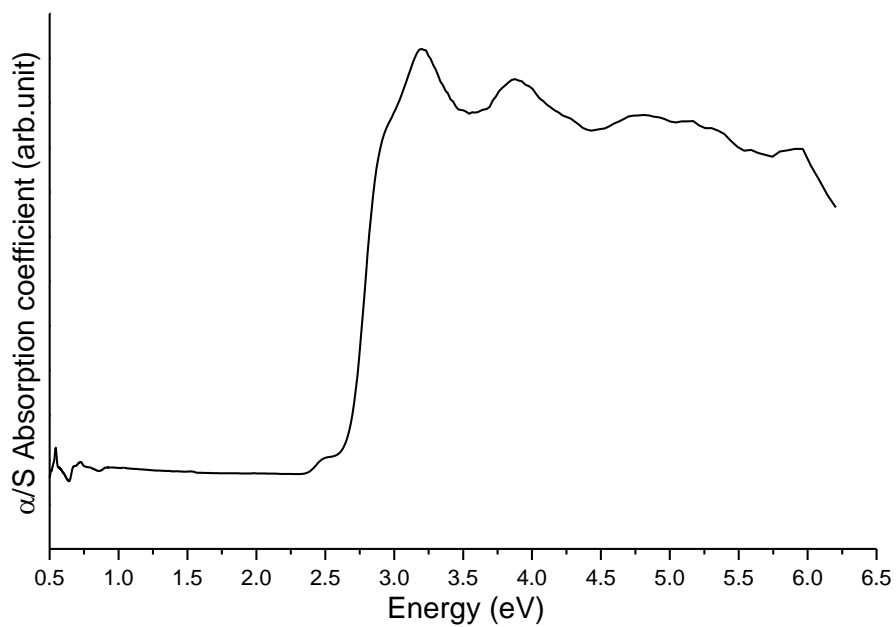

**Fig. S4** Optical absorption spectra of **1c**.

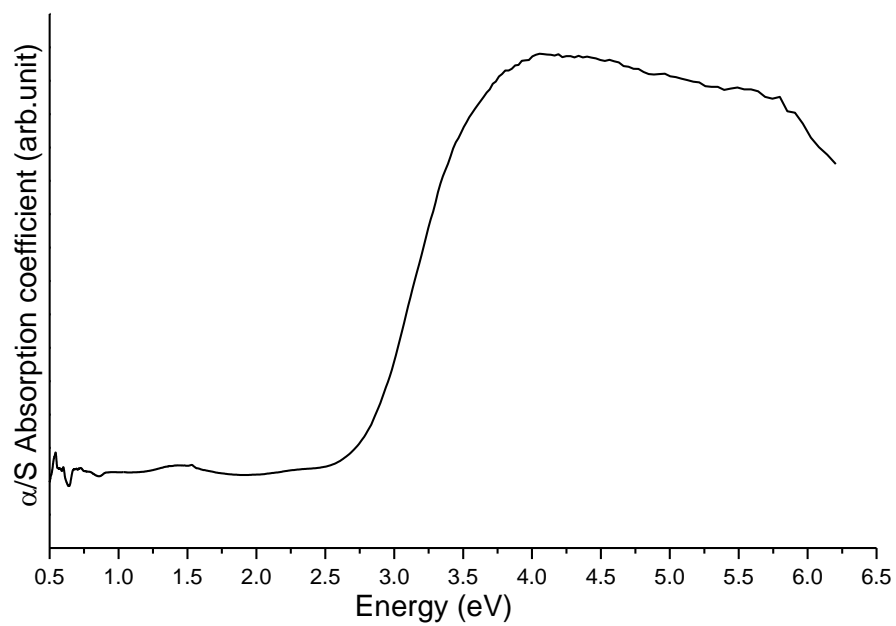

**Fig. S5** Optical absorption spectra of **2b**.
